# Supplementary material
Source: PubMed Central journal article supplement (PMC3357996)
Supplement: cr2011186x2.pdf [file cr2011186x2.pdf]

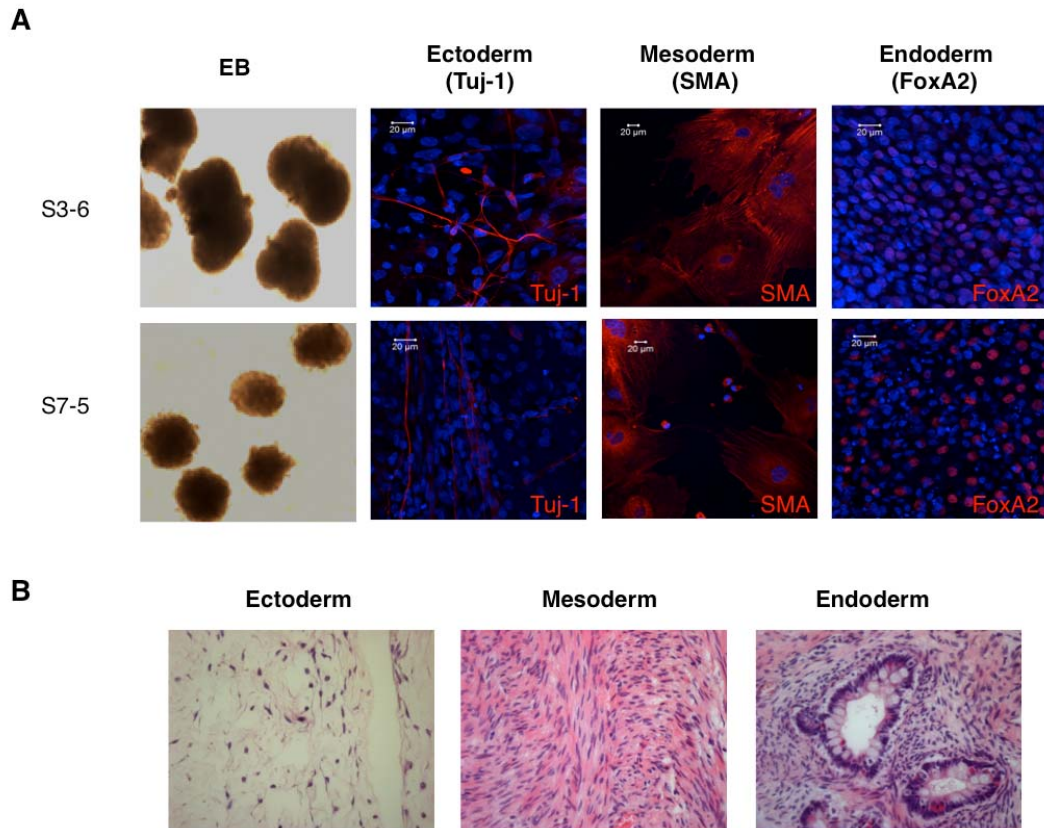

**Supplementary information, Figure S2** *In vitro* and *in vivo* differentiation of SCD-iPSCs.

(A) Immunofluorescence analysis performed on EBs derived from SCD-iPSC lines (top panels: S3-6, bottom panels: S7-5) showing expression of ectodermal (Tuj-1, red), mesodermal (SMA, red), and endodermal (FOXA2, red) markers. Nuclei were stained with DAPI (blue). Bar, 20  $\mu$ m. (B) Hematoxylin and eosin staining in teratomas derived from SCD-iPSCs.
